# Supplementary material
Source: MDPI journal article supplement (https://www.mdpi.com/2313-0105/9/3/146)
Supplement: s1 [file s1]

# Aging of a lithium-metal/LFP cell: predictive model and experimental validation

Davide Dessantis <sup>1</sup>, Piera Di Prima <sup>1</sup>, Daniele Versaci <sup>2</sup>, Julia Amici <sup>2,\*</sup>, Carlotta Francia <sup>2</sup>, Silvia Bodoardo <sup>2</sup>, Massimo Santarelli <sup>1,\*</sup>

<sup>1</sup> Department of Energy, Polytechnic of Turin, 10129 Turin, Italy

<sup>2</sup> Department of Applied Science and Technology, Polytechnic of Turin, 10129 Turin, Italy

\* Correspondence: julia.amici@polito.it (J.A.); massimo.santarelli@polito.it (M.S.)

**Table S1.** Error values between model and experimental data.

| Cycle step                         | Error Values for Model-Experiment |       |       |       |
|------------------------------------|-----------------------------------|-------|-------|-------|
|                                    | C/10                              | C/5   | C/2   | 1C    |
| Charge Capacity 1 <sup>st</sup>    | 0.34%                             | 0.21% | 0.20% | 0.22% |
| Discharge Capacity 1 <sup>st</sup> | 0.08%                             | 0.01% | 0.38% | 2.43% |
| Charge Capacity 2 <sup>nd</sup>    | 0.15%                             | 0%    | 0%    | 1.62% |
| Discharge Capacity 2 <sup>nd</sup> | -0.73%                            | 0.01% | 0%    | 1.73% |
| Charge Capacity 3 <sup>rd</sup>    | -0.72%                            | 0.01% | 0%    | 1.36% |
| Discharge Capacity 3 <sup>rd</sup> | -0.75%                            | 0%    | 0%    | 1.15% |

**Table S2.** Comparison of discharge capacity and capacity loss values obtained experimentally and from the model.

|                                                            | Experimental |        | Simulation |        |
|------------------------------------------------------------|--------------|--------|------------|--------|
|                                                            | C/2          | 1C     | C/2        | 1C     |
| Discharge Capacity 1 <sup>st</sup> [mAh g <sup>-1</sup> ]  | 127.87       | 119.01 | 127.83     | 118.09 |
| Discharge Capacity 50 <sup>th</sup> [mAh g <sup>-1</sup> ] | 124.21       | 114.21 | 124.77     | 113.46 |
| Capacity loss                                              | 2.86%        | 4.03%  | 2.39%      | 3.92%  |

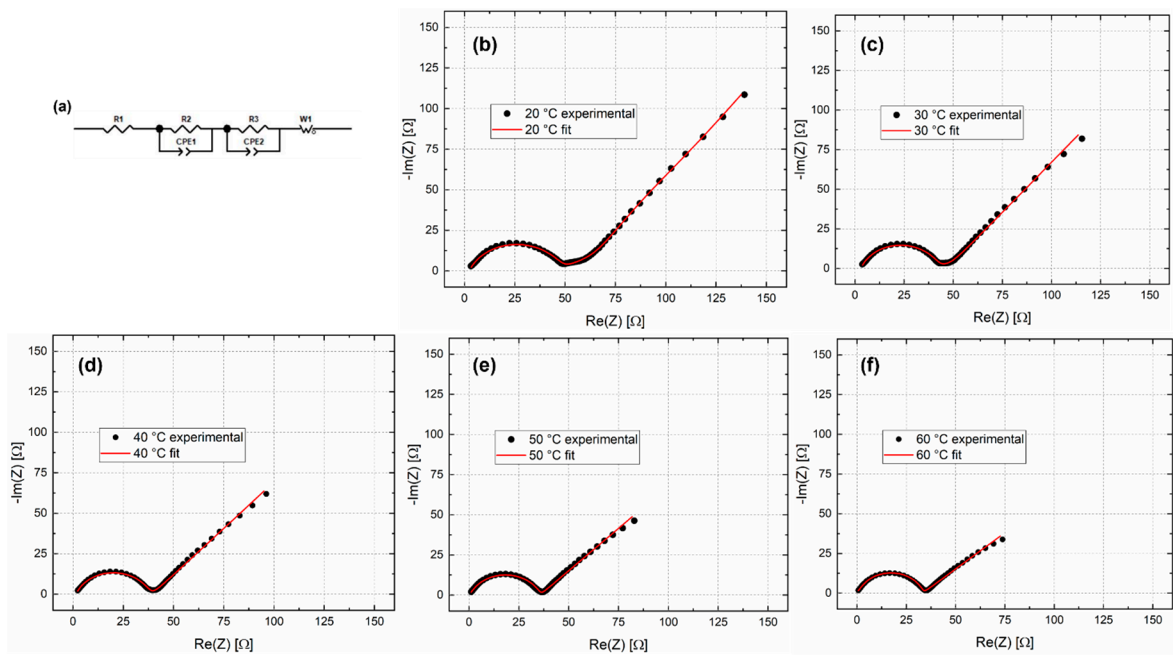

**Figure S1.** Equivalent circuit model (a) used to fit EIS at 20 °C (b), 30 °C (c), 40 °C (d), 50 °C (e) and 60 °C (f).
